# Supplementary material
Source: Springer Nature journal article supplement (https://www.springermedizin.de/resource/supplementary/12947_2009_279_MOESM2_ESM.pdf/9556602)

**CA-IMT**

**(mm)**

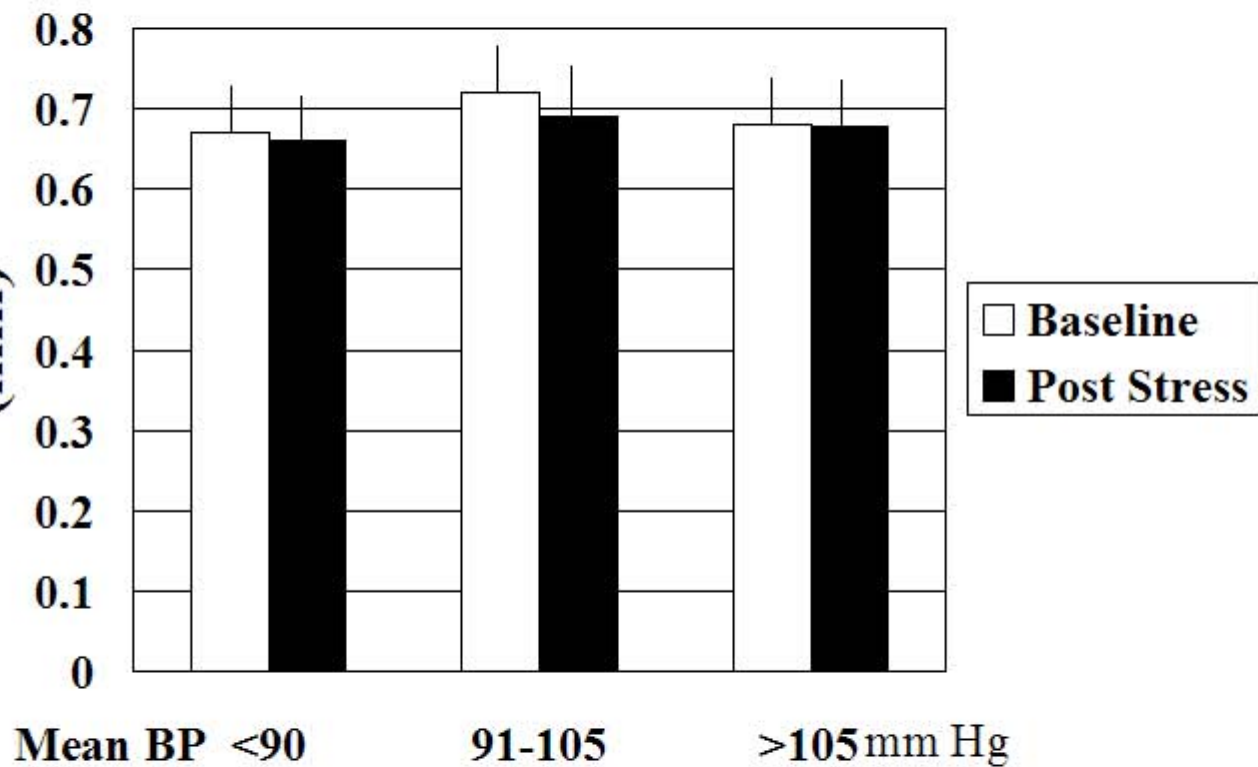

Supplement: MOESM2 [file 9556602]
